# Supplementary material for: Chitosan-encapsulated manganese ferrite particles bearing sulfonic acid group catalyzed efficient synthesis of spiro indenoquinoxalines
Source: Royal Society of Chemistry journal article supplement (doi:10.1039/d0ra04925e), 2020-01-01

## SUPPLEMENTARY INFORMATION

### Manganese ferrite particles encapsulated-chitosan bearing sulfonic acid group catalyzed efficient synthesis of spiro indenoquinoxalines

Authors: Sepideh Lahouti and Hossein Naeimi\*

#### NMR data

<sup>1</sup>H NMR spectra of 5-(4-methoxyphenyl)-10H-spiro[diindeno[1,2-b:2',1'-e]pyridine-11,11'-indeno[1,2-b]quinoxaline]-10,12(5H)-dione (5a)

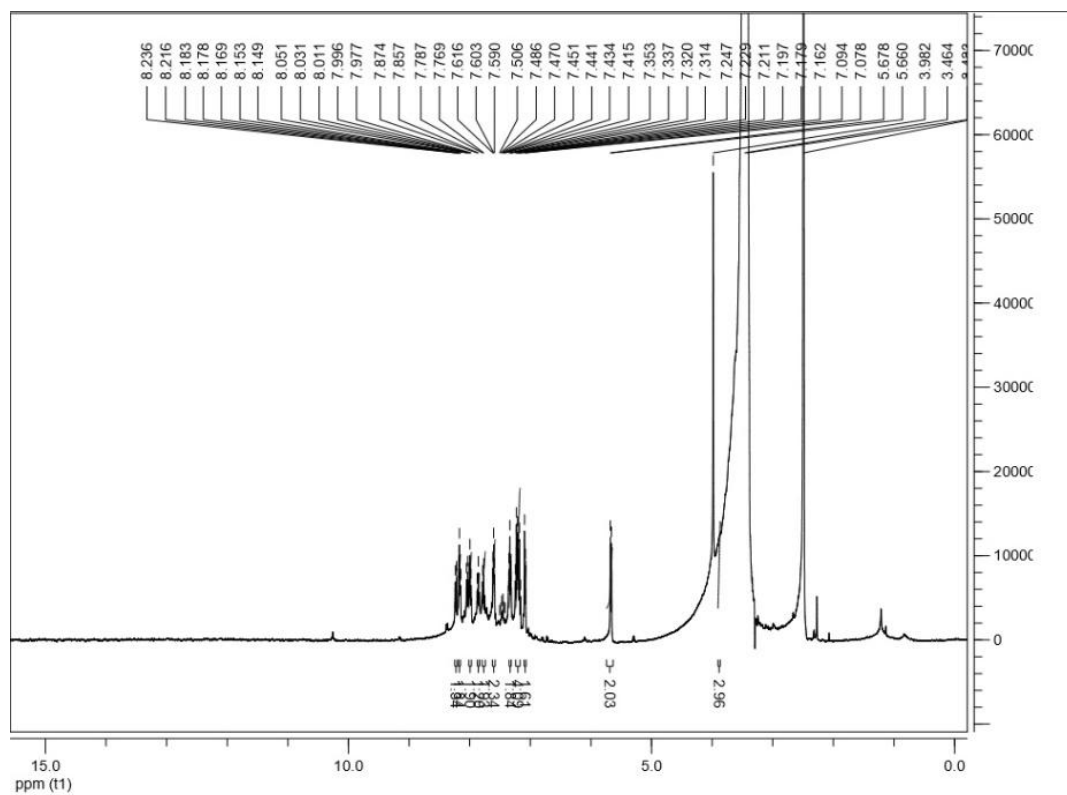

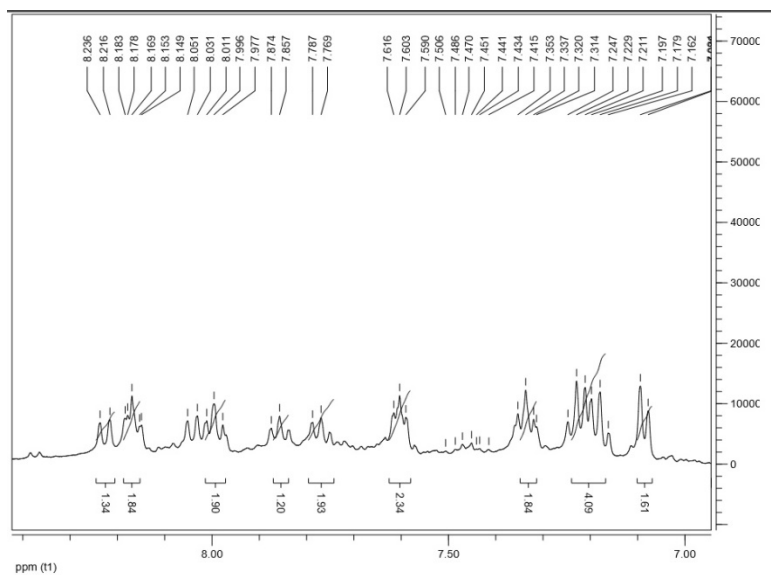

$^1\text{H}$  NMR spectra of 5-(3-chlorophenyl)-10H-spiro[diindeno[1,2-b:2',1'-e]pyridine-11,11'-indeno[1,2-b]quinoxaline]-10,12(5H)-dione (5b)

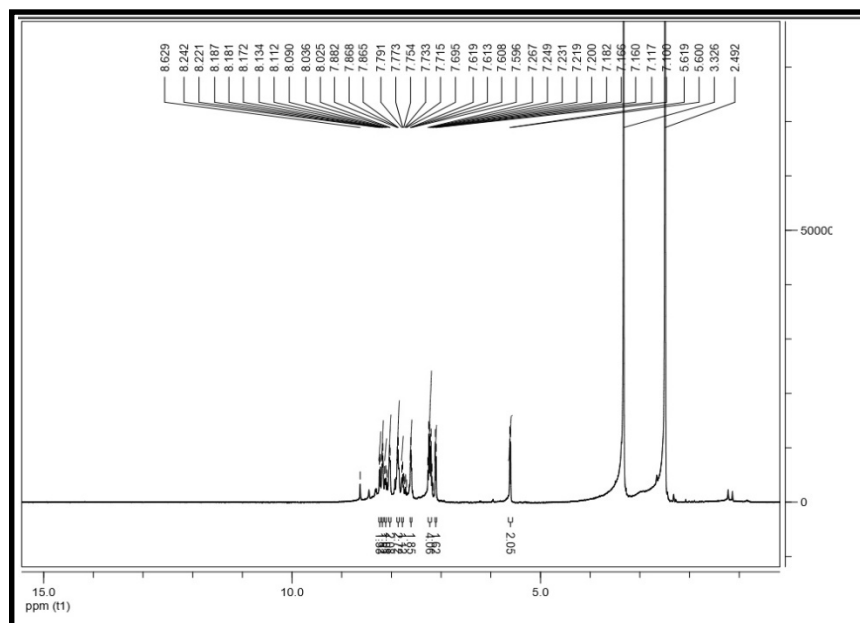



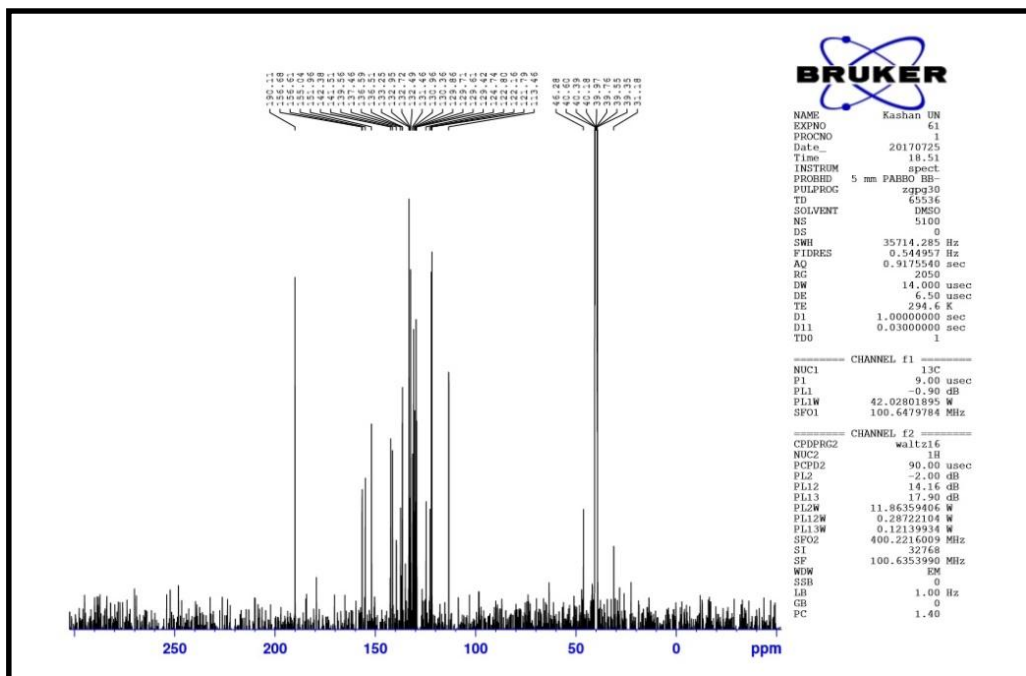

$^1\text{H}$  NMR spectra of 5-(4-hydroxyphenyl)-10H-spiro[diindeno[1,2-b:2',1'-e]pyridine-11,11'-indeno[1,2-b]quinoxaline]-10,12(5H)-dione (5c)

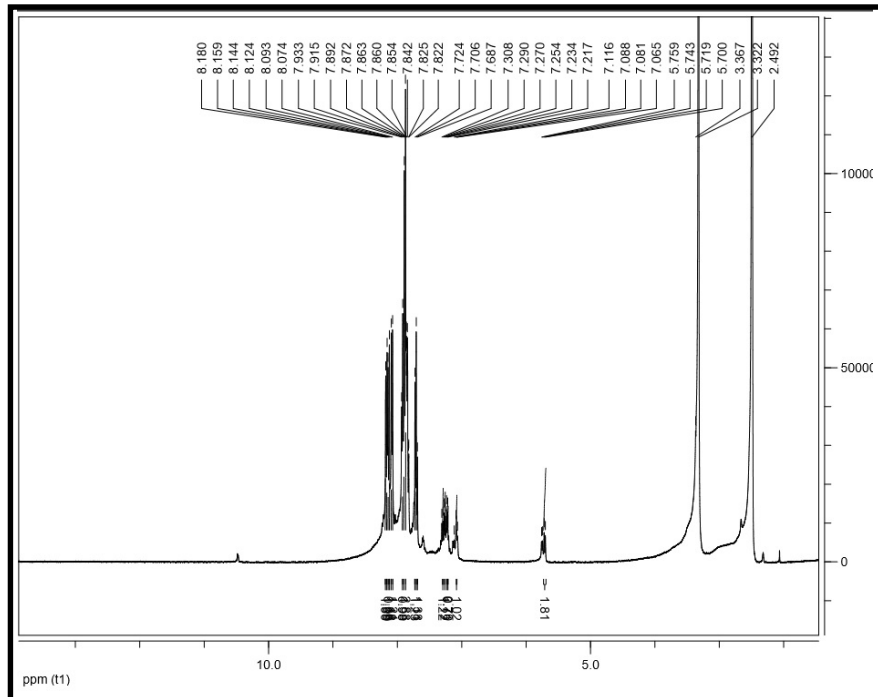

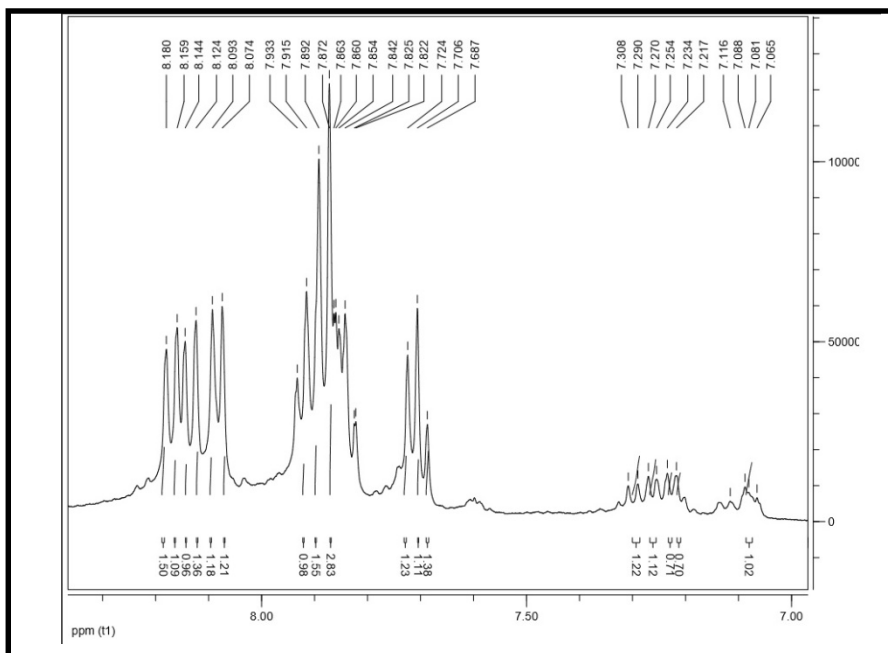

$^1\text{H}$  NMR spectra of 5-(4-chlorophenyl)-10H-spiro[diindeno[1,2-b:2',1'-e]pyridine-11,11'-indeno[1,2-b]quinoxaline]-10,12(5H)-dione (5d)

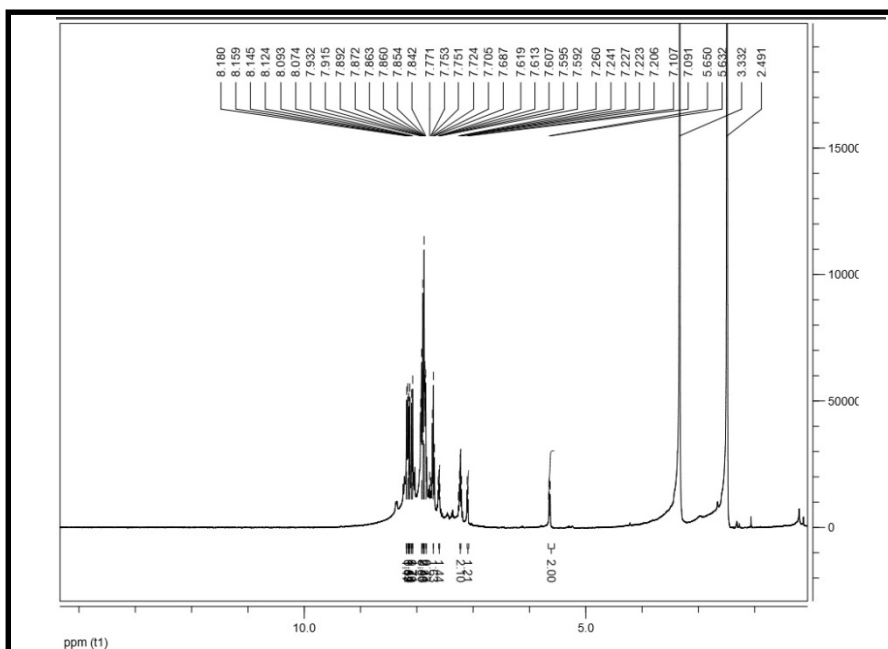

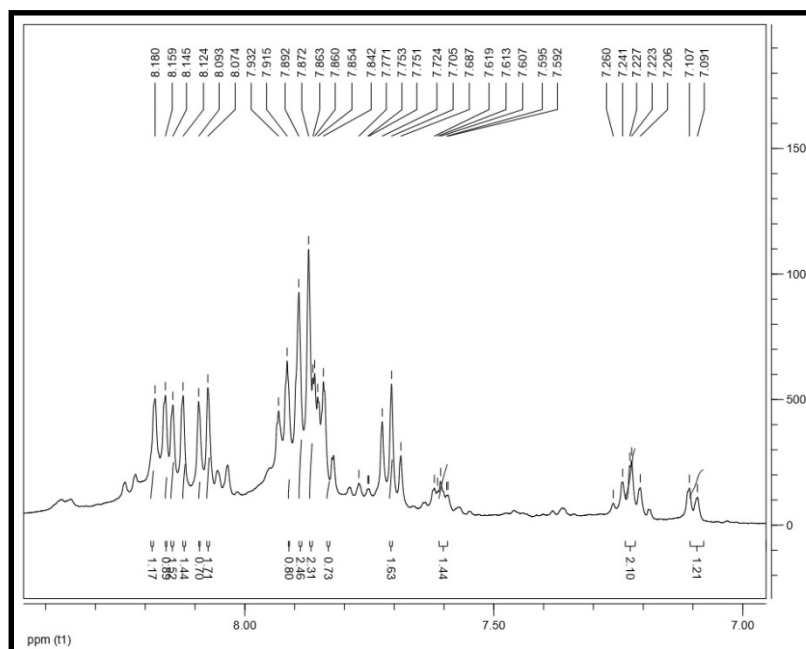

$^1\text{H}$  NMR spectra of 5-(3-nitrophenyl)-10H-spiro[diindeno[1,2-b:2',1'-e]pyridine-11,11'-indeno[1,2-b]quinoxaline]-10,12(5H)-dione (5e)

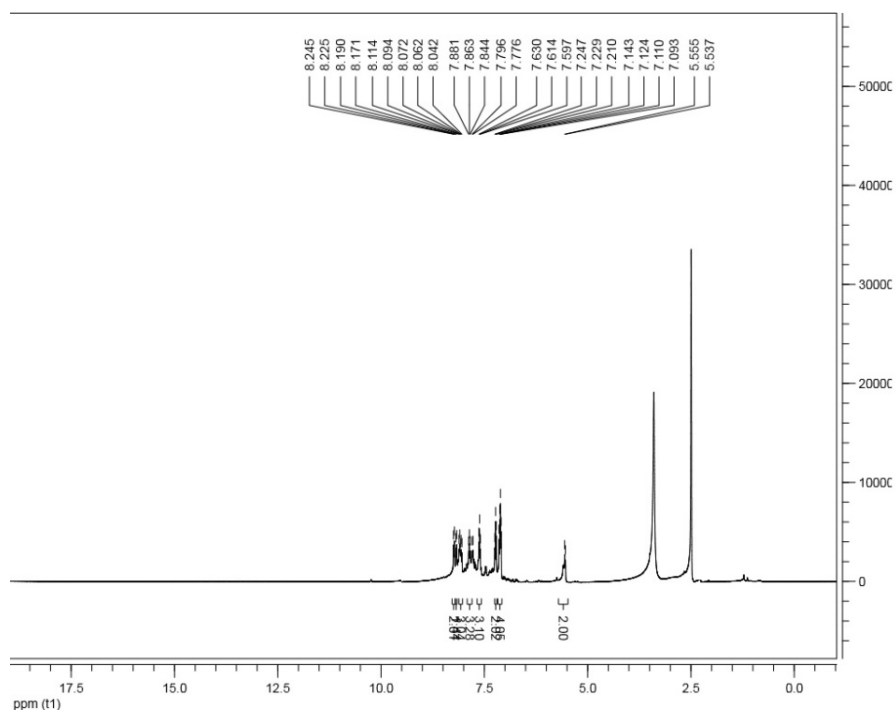

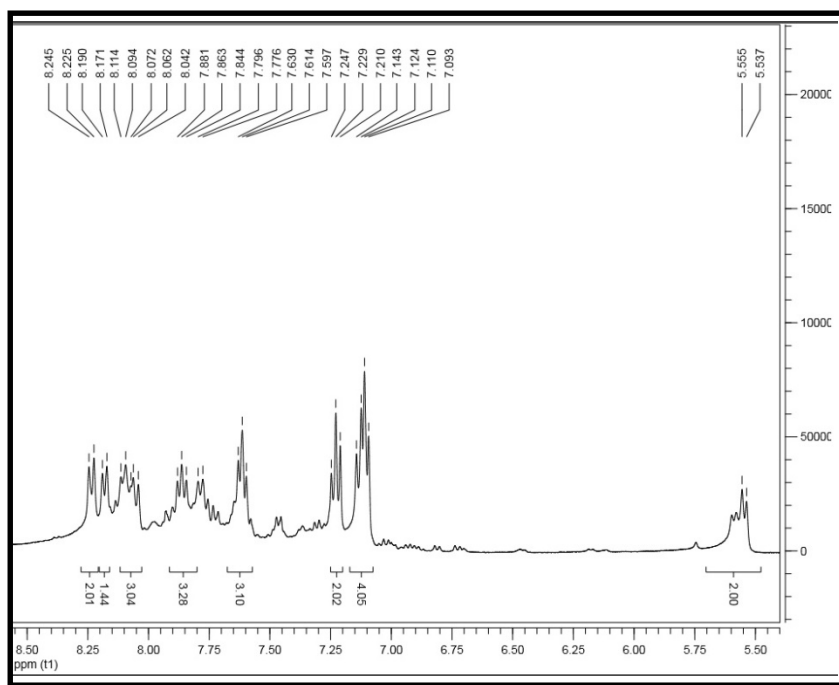

$^1\text{H}$  NMR spectra of 5-(2-chlorophenyl)-10H-spiro[diindeno[1,2-b:2',1'-e]pyridine-11,11'-indeno[1,2-b]quinoxaline]-10,12(5H)-dione (5f)

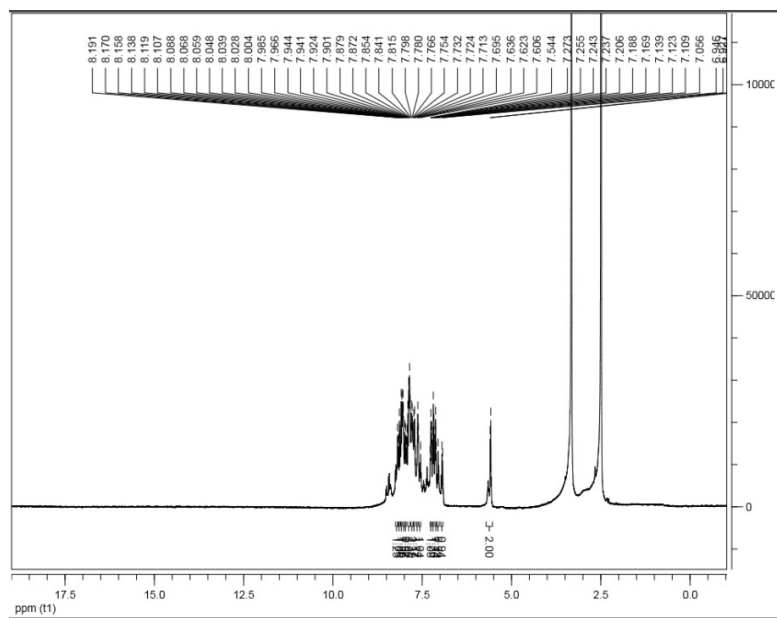





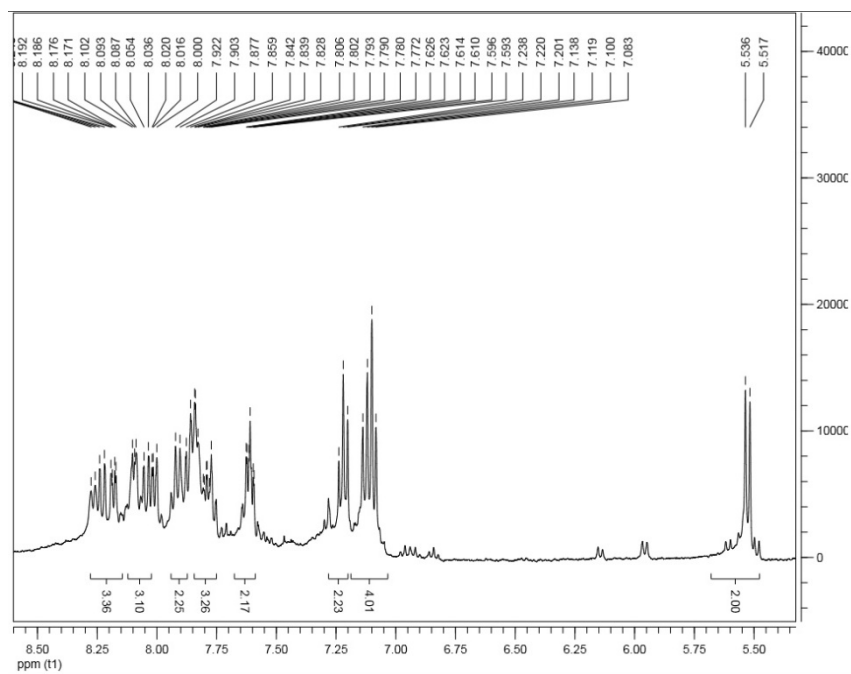

<sup>1</sup>H NMR spectra of 5-(o-tolyl)-10H-spiro[diindeno[1,2-b:2',1'-e]pyridine-11,11'-indeno[1,2-b]quinoxaline]-10,12(5H)-dione (5h)

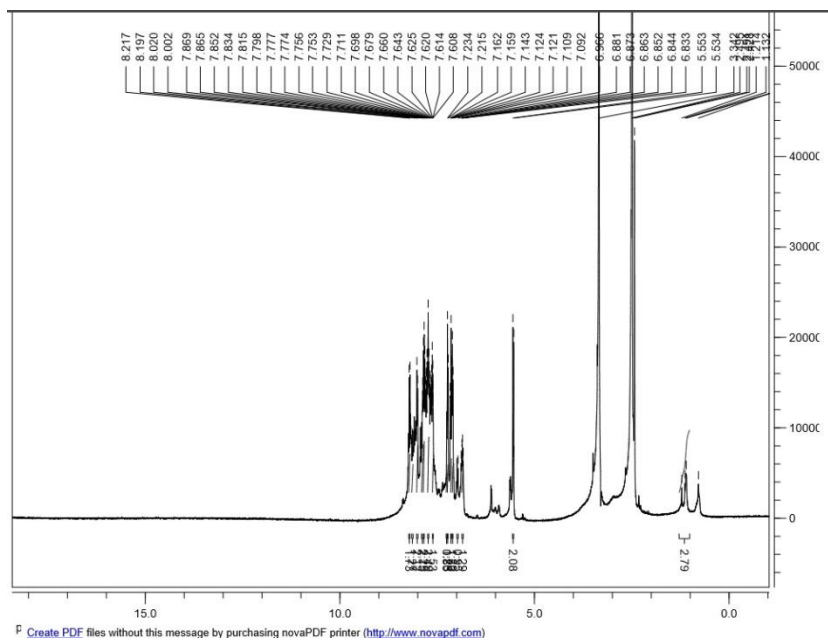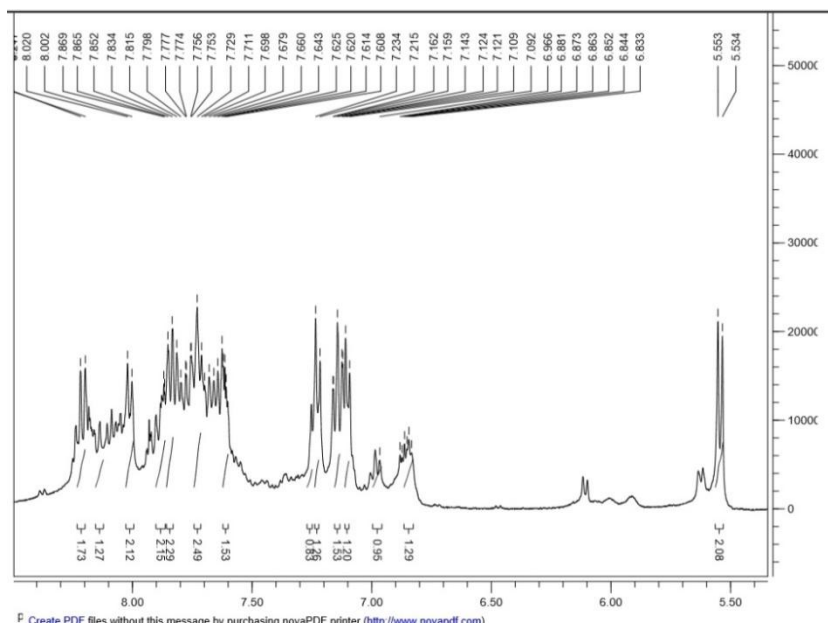

<sup>13</sup>C NMR spectra of 5-(o-tolyl)-10H-spiro[diindeno[1,2-b:2',1'-e]pyridine-11,11'-indeno[1,2-b]quinoxaline]-10,12(5H)-dione (5h)

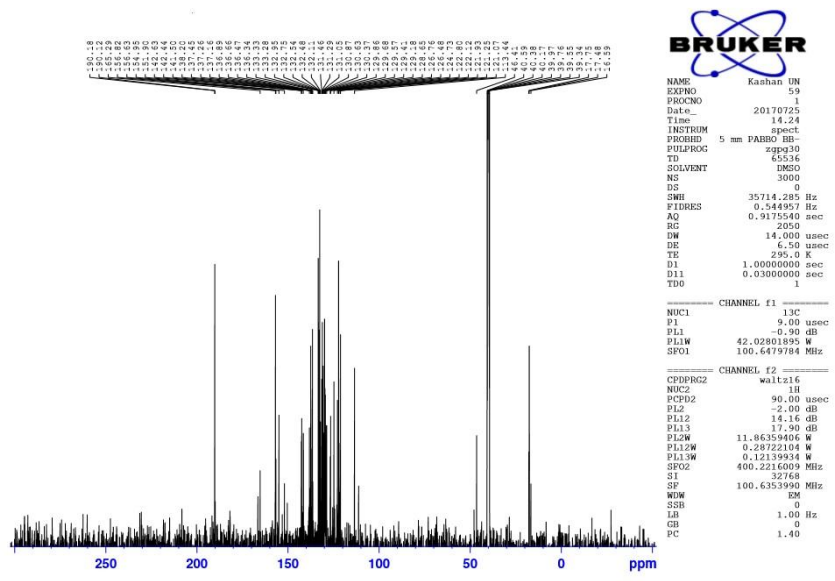

<sup>1</sup>H NMR spectra of 5-(2,4-dimethylphenyl)-10H-spiro[diindeno[1,2-b:2',1'-e]pyridine-11,11'-indeno[1,2-b]quinoxaline]-10,12(5H)-dione (5i)



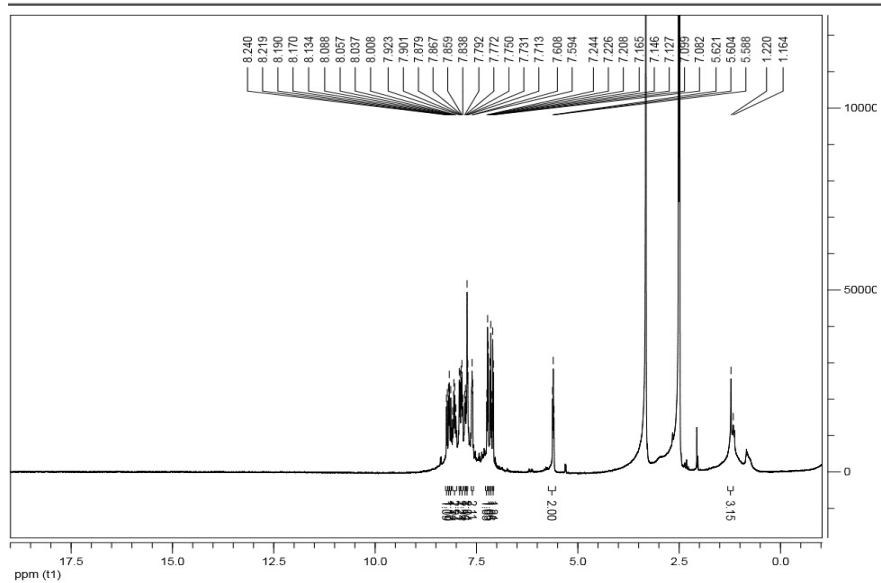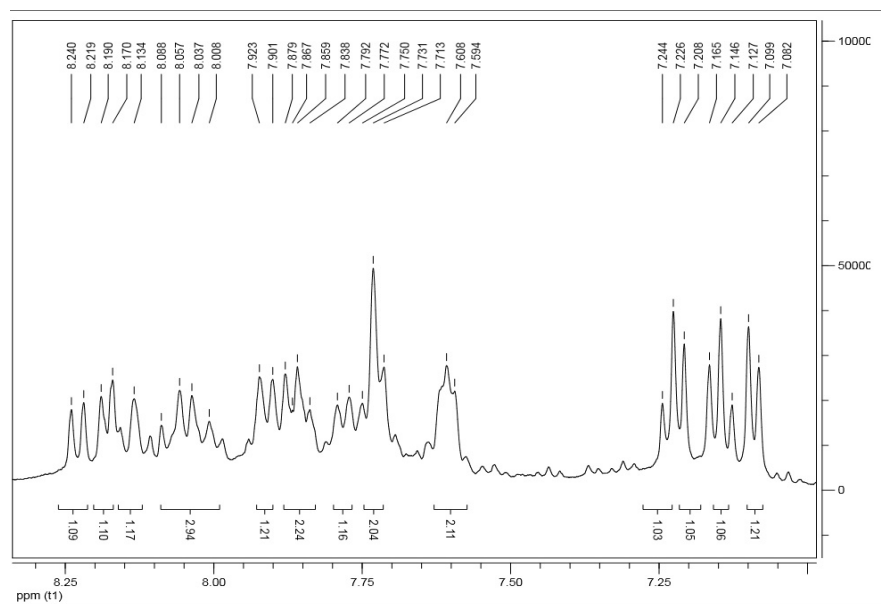

<sup>1</sup>H NMR spectra of 5-(4-nitrophenyl)-10H-spiro[diindeno[1,2-b:2',1'-e]pyridine-11,11'-indeno[1,2-b]quinoxaline]-10,12(5H)-dione (5m)

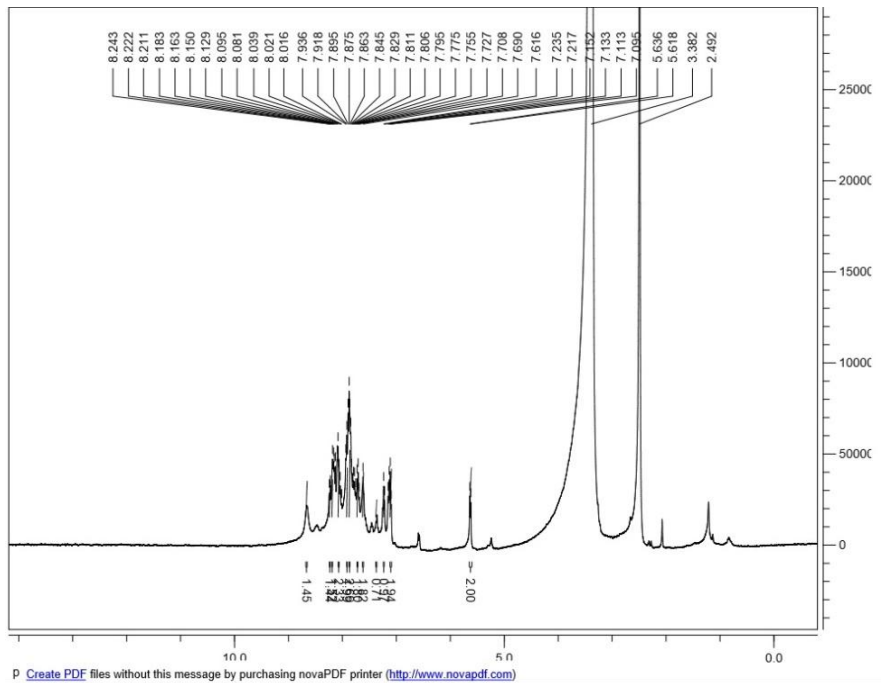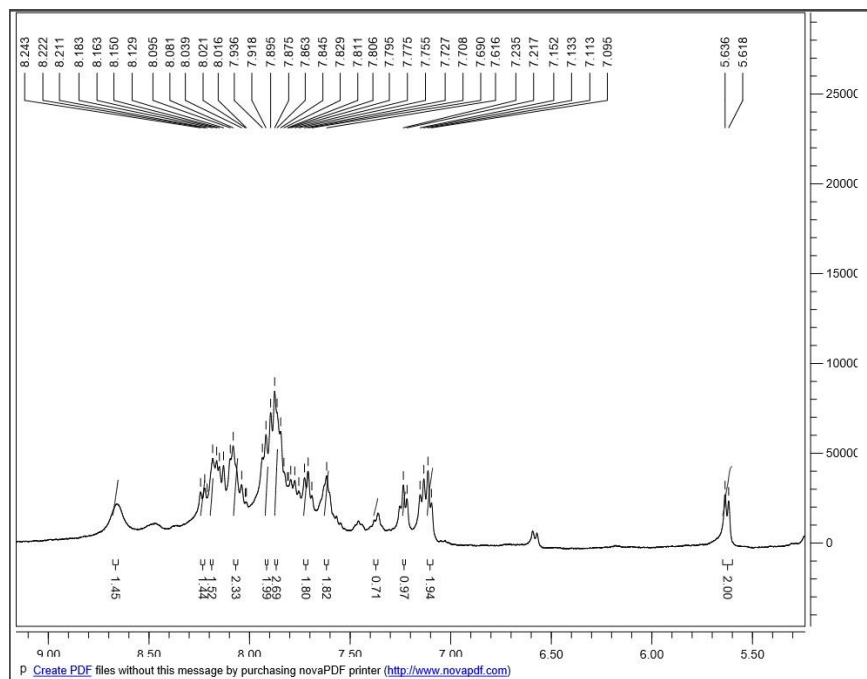

Supplement: d0ra04925e1.pdf [file d0ra04925e1.pdf]
